# Supplementary material for: Design, Synthesis, and Biological Evaluation of Novel Coumarin Analogs Targeted against SARS-CoV-2
Source: MDPI journal article supplement (doi:10.3390/molecules29061406), 2024-03-21

**Table S1.** List of the screened 91 molecules on the corresponding bioisosteric sites.

| S. No. | Molecule ID | Structure                                                                           | S. No. | Molecule ID | Structure                                                                             |
|--------|-------------|-------------------------------------------------------------------------------------|--------|-------------|---------------------------------------------------------------------------------------|
| 1      | KS1         | 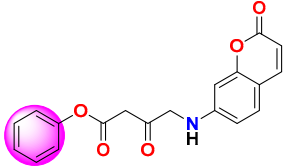   | 41     | KS49        |    |
| 2      | KS2         |    | 42     | KS50        |    |
| 3      | KS3         |    | 43     | KS51        |    |
| 4      | KS4         |   | 44     | KS53        |  |
| 5      | KS5         |  | 45     | KS56        |  |
| 6      | KS6         |  | 46     | KS57        |  |
| 7      | KS7         |  | 47     | KS58        |  |
| 8      | KS8         |  | 48     | KS60        |  |

|    |      |                                                                                     |    |      |                                                                                       |
|----|------|-------------------------------------------------------------------------------------|----|------|---------------------------------------------------------------------------------------|
| 9  | KS9  | 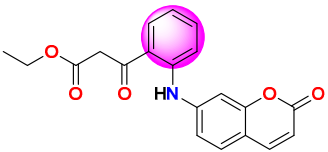   | 49 | KS62 |    |
| 10 | KS10 |    | 50 | KS63 |    |
| 11 | KS11 |    | 51 | KS64 |    |
| 12 | KS12 |    | 52 | KS65 |    |
| 13 | KS13 |   | 53 | KS66 |   |
| 14 | KS14 |  | 54 | KS67 |  |
| 15 | KS15 |  | 55 | KS72 |  |
| 16 | KS16 |  | 56 | KS74 |  |
| 17 | KS17 |  | 57 | KS79 |  |
| 18 | KS18 |  | 58 | KS80 |  |

|    |      |                                                                                     |    |      |                                                                                       |
|----|------|-------------------------------------------------------------------------------------|----|------|---------------------------------------------------------------------------------------|
| 19 | KS19 | 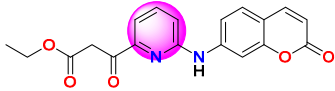   | 59 | KS81 |    |
| 20 | KS20 |    | 60 | KS82 |    |
| 21 | KS21 |    | 61 | KS83 |    |
| 22 | KS22 |    | 62 | KS84 |    |
| 23 | KS23 |   | 63 | KS85 |   |
| 24 | KS25 |  | 64 | KS86 |  |
| 25 | KS26 |  | 65 | KS87 |  |
| 26 | KS27 |  | 66 | KS88 |  |
| 27 | KS28 |  | 67 | KS89 |  |

|    |      |                                                                                     |    |       |                                                                                       |
|----|------|-------------------------------------------------------------------------------------|----|-------|---------------------------------------------------------------------------------------|
| 28 | KS29 | 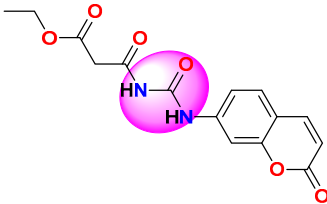   | 68 | KS90  |    |
| 29 | KS32 |    | 69 | KS91  |    |
| 30 | KS34 |    | 70 | KS92  |    |
| 31 | KS35 |    | 71 | KS93  |    |
| 32 | KS36 |   | 72 | KS94  |   |
| 33 | KS37 |  | 73 | KS95  |  |
| 34 | KS38 |  | 74 | KS96  |  |
| 35 | KS39 |  | 75 | KS97  |  |
| 36 | KS41 |  | 76 | KS98  |  |
| 37 | KS42 |  | 77 | KS99  |  |
| 38 | KS43 |  | 78 | KS100 |  |

|    |      |                                                                                   |    |       |                                                                                     |
|----|------|-----------------------------------------------------------------------------------|----|-------|-------------------------------------------------------------------------------------|
| 39 | KS44 | 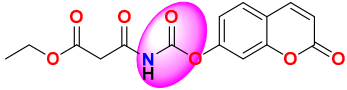 | 79 | KS101 |  |
| 40 | KS45 |  | 80 | KS102 |  |
| 41 | KS47 |  |    |       |                                                                                     |

**Table S2.** The predicted Pharmacokinetic (ADME) profile of top 80 molecules.

| S. No. | Molecule | MW     | HBA | HBD | TPSA   | Consensus<br>Log P | Silicos-IT<br>LogSw | GI<br>absorption | BBB<br>permeant | Lipinski<br>#violations |
|--------|----------|--------|-----|-----|--------|--------------------|---------------------|------------------|-----------------|-------------------------|
| 1      | KS1      | 337.33 | 5   | 1   | 85.61  | 2.64               | -6.6                | High             | No              | 0                       |
| 2      | KS2      | 367.35 | 6   | 1   | 94.84  | 2.68               | -6.7                | High             | No              | 0                       |
| 3      | KS3      | 275.26 | 5   | 1   | 85.61  | 1.55               | -4.5                | High             | No              | 0                       |
| 4      | [KS4]    | 371.77 | 5   | 1   | 85.61  | 3.17               | -7.19               | High             | No              | 0                       |
| 5      | [KS5]    | 317.34 | 5   | 1   | 85.61  | 2.33               | -5.3                | High             | No              | 0                       |
| 6      | [KS6]    | 416.22 | 5   | 1   | 85.61  | 3.31               | -7.39               | High             | No              | 0                       |
| 7      | [KS7]    | 319.27 | 7   | 2   | 122.91 | 0.93               | -3.87               | High             | No              | 0                       |
| 8      | [KS8]    | 353.33 | 6   | 2   | 105.84 | 2.29               | -6.01               | High             | No              | 0                       |
| 9      | [KS9]    | 351.35 | 5   | 1   | 85.61  | 3.31               | -6.97               | High             | No              | 0                       |
| 10     | [KS10]   | 318.28 | 6   | 2   | 114.71 | 1.32               | -4.48               | High             | No              | 0                       |
| 11     | [KS11]   | 317.29 | 6   | 1   | 102.68 | 1.59               | -4.83               | High             | No              | 0                       |
| 12     | [KS12]   | 303.27 | 6   | 1   | 102.68 | 1.29               | -4.43               | High             | No              | 0                       |
| 13     | [KS13]   | 303.31 | 5   | 1   | 85.61  | 2.17               | -5.29               | High             | No              | 0                       |
| 14     | [KS14]   | 290.27 | 5   | 2   | 97.64  | 1.45               | -4.54               | High             | No              | 0                       |
| 15     | [KS15]   | 289.28 | 5   | 1   | 85.61  | 1.88               | -4.9                | High             | No              | 0                       |
| 16     | [KS16]   | 352.34 | 6   | 1   | 98.5   | 2.6                | -6.6                | High             | No              | 0                       |
| 17     | [KS17]   | 352.34 | 6   | 1   | 98.5   | 2.79               | -6.6                | High             | No              | 0                       |
| 18     | [KS18]   | 319.27 | 7   | 1   | 111.91 | 1.73               | -4.17               | High             | No              | 0                       |
| 19     | [KS19]   | 352.34 | 6   | 1   | 98.5   | 2.6                | -6.6                | High             | No              | 0                       |
| 20     | [KS20]   | 352.34 | 6   | 1   | 98.5   | 2.43               | -6.6                | High             | No              | 0                       |
| 21     | [KS21]   | 352.34 | 6   | 1   | 98.5   | 2.62               | -6.6                | High             | No              | 0                       |
| 22     | [KS22]   | 275.26 | 5   | 1   | 85.61  | 1.74               | -4.5                | High             | No              | 0                       |
| 23     | [KS23]   | 289.28 | 5   | 1   | 85.61  | 1.62               | -4.9                | High             | No              | 0                       |
| 24     | [KS25]   | 303.31 | 5   | 1   | 85.61  | 1.92               | -5.29               | High             | No              | 0                       |
| 25     | [KS26]   | 290.27 | 6   | 0   | 82.81  | 2.13               | -4.58               | High             | No              | 0                       |
| 26     | [KS27]   | 276.24 | 6   | 0   | 82.81  | 1.98               | -4.18               | High             | No              | 0                       |
| 27     | [KS28]   | 303.27 | 6   | 1   | 102.68 | 1.37               | -4.43               | High             | No              | 0                       |
| 28     | [KS29]   | 318.28 | 6   | 2   | 114.71 | 1.32               | -4.48               | High             | No              | 0                       |
| 29     | [KS32]   | 304.29 | 6   | 0   | 82.81  | 2.15               | -4.98               | High             | No              | 0                       |
| 30     | [KS34]   | 344.36 | 5   | 0   | 80.06  | 1.65               | -4.19               | High             | No              | 0                       |
| 31     | [KS35]   | 303.31 | 5   | 0   | 76.82  | 1.9                | -4.56               | High             | No              | 0                       |
| 32     | [KS36]   | 303.27 | 6   | 1   | 102.68 | 1.29               | -4.43               | High             | No              | 0                       |
| 33     | [KS37]   | 317.34 | 5   | 0   | 76.82  | 2.21               | -4.96               | High             | No              | 0                       |
| 34     | [KS38]   | 334.35 | 5   | 2   | 129.73 | 1.93               | -4.67               | High             | No              | 0                       |
| 35     | [KS39]   | 306.27 | 7   | 0   | 92.04  | 2.09               | -4.32               | High             | No              | 0                       |
| 36     | [KS41]   | 290.27 | 5   | 2   | 97.64  | 1.45               | -4.54               | High             | No              | 0                       |
| 37     | [KS42]   | 317.29 | 6   | 1   | 102.68 | 1.36               | -4.83               | High             | No              | 0                       |
| 38     | [KS43]   | 289.28 | 5   | 0   | 76.82  | 1.86               | -4.16               | High             | No              | 0                       |
| 39     | [KS44]   | 319.27 | 7   | 1   | 111.91 | 1.4                | -4.17               | High             | No              | 0                       |
| 40     | [KS45]   | 304.25 | 7   | 0   | 99.88  | 1.81               | -4.12               | High             | No              | 0                       |
| 41     | [KS49]   | 304.25 | 7   | 0   | 99.88  | 1.71               | -4.12               | High             | No              | 0                       |
| 42     | [KS50]   | 288.25 | 6   | 0   | 90.65  | 1.46               | -4.39               | High             | No              | 0                       |

|    |         |        |   |   |        |      |       |      |    |   |
|----|---------|--------|---|---|--------|------|-------|------|----|---|
| 43 | [KS51]  | 319.27 | 7 | 1 | 111.91 | 1.73 | -4.17 | High | No | 0 |
| 44 | [KS53]  | 320.36 | 5 | 0 | 98.88  | 2.62 | -5.34 | High | No | 0 |
| 45 | [KS56]  | 317.29 | 6 | 0 | 93.89  | 1.77 | -4.1  | High | No | 0 |
| 46 | [KS57]  | 326.3  | 6 | 0 | 91.4   | 2.02 | -4.95 | High | No | 0 |
| 47 | [KS58]  | 289.28 | 5 | 1 | 85.61  | 1.83 | -4.9  | High | No | 0 |
| 48 | [KS60]  | 303.31 | 5 | 1 | 85.61  | 2.11 | -5.28 | High | No | 0 |
| 49 | [KS62]  | 317.34 | 5 | 1 | 85.61  | 2.42 | -5.66 | High | No | 0 |
| 50 | [KS63]  | 289.28 | 5 | 1 | 85.61  | 1.88 | -4.9  | High | No | 0 |
| 51 | [KS64]  | 317.34 | 5 | 1 | 85.61  | 2.33 | -5.3  | High | No | 0 |
| 52 | [KS65]  | 303.31 | 5 | 1 | 85.61  | 2.15 | -4.92 | High | No | 0 |
| 53 | [KS66]  | 289.28 | 5 | 1 | 85.61  | 1.62 | -4.9  | High | No | 0 |
| 54 | [KS67]  | 290.27 | 6 | 0 | 82.81  | 2.13 | -4.58 | High | No | 0 |
| 55 | [KS72]  | 303.27 | 6 | 1 | 102.68 | 1.29 | -4.43 | High | No | 0 |
| 56 | [KS74]  | 290.27 | 5 | 2 | 97.64  | 1.45 | -4.54 | High | No | 0 |
| 57 | [KS79]  | 317.34 | 5 | 1 | 85.61  | 2.11 | -5.3  | High | No | 0 |
| 58 | [KS80]  | 290.27 | 6 | 0 | 82.81  | 1.98 | -4.58 | High | No | 0 |
| 59 | [KS81]  | 304.29 | 6 | 0 | 82.81  | 2.3  | -4.97 | High | No | 0 |
| 60 | [KS82]  | 366.36 | 6 | 0 | 82.81  | 3.28 | -7.06 | High | No | 0 |
| 61 | [KS83]  | 354.31 | 7 | 1 | 103.04 | 2.36 | -5.7  | High | No | 0 |
| 62 | [KS84]  | 368.34 | 7 | 1 | 103.04 | 2.7  | -6.08 | High | No | 0 |
| 63 | [KS85]  | 430.41 | 7 | 1 | 103.04 | 3.7  | -8.15 | High | No | 0 |
| 64 | [KS86]  | 332.31 | 6 | 2 | 114.71 | 1.31 | -4.88 | High | No | 0 |
| 65 | [KS87]  | 346.33 | 6 | 2 | 114.71 | 1.68 | -5.25 | High | No | 0 |
| 66 | [KS88]  | 408.4  | 6 | 2 | 114.71 | 2.52 | -7.33 | High | No | 0 |
| 67 | [KS89]  | 396.35 | 7 | 3 | 134.94 | 1.77 | -5.98 | High | No | 0 |
| 68 | [KS90]  | 410.38 | 7 | 3 | 134.94 | 2.03 | -6.35 | High | No | 0 |
| 69 | [KS91]  | 472.45 | 7 | 3 | 134.94 | 3.02 | -8.42 | Low  | No | 0 |
| 70 | [KS92]  | 338.31 | 6 | 0 | 82.81  | 2.76 | -6.28 | High | No | 0 |
| 71 | [KS93]  | 352.34 | 6 | 0 | 82.81  | 3.12 | -6.66 | High | No | 0 |
| 72 | [KS94]  | 414.41 | 6 | 0 | 82.81  | 4.06 | -8.74 | High | No | 0 |
| 73 | [KS95]  | 417.21 | 6 | 0 | 82.81  | 3.36 | -7.08 | High | No | 0 |
| 74 | [KS96]  | 431.23 | 6 | 0 | 82.81  | 3.66 | -7.45 | High | No | 0 |
| 75 | [KS97]  | 493.3  | 6 | 0 | 82.81  | 4.63 | -9.51 | High | No | 0 |
| 76 | [KS98]  | 380.35 | 6 | 2 | 114.71 | 2.11 | -6.57 | High | No | 0 |
| 77 | [KS99]  | 394.38 | 6 | 2 | 114.71 | 2.35 | -6.94 | High | No | 0 |
| 78 | [KS100] | 456.45 | 6 | 2 | 114.71 | 3.36 | -9.01 | High | No | 0 |
| 79 | [KS101] | 459.25 | 6 | 2 | 114.71 | 2.73 | -7.35 | High | No | 0 |
| 80 | [KS102] | 473.27 | 6 | 2 | 114.71 | 2.99 | -7.72 | High | No | 0 |

### Characterization of Synthesized Compounds

All the synthesized chromen derivatives were characterized by their physical properties as well as spectral analysis using IR, NMR and Mass spectroscopy.

### Physicochemical properties and TLC data of synthesized compounds

| Compound Codes | Molecular Formula                              | Molecular Weight | % Yield | m.p. (°C) | R <sub>f</sub> value <sup>*</sup> |
|----------------|------------------------------------------------|------------------|---------|-----------|-----------------------------------|
| KS-80          | C <sub>15</sub> H <sub>14</sub> O <sub>6</sub> | 290.27           | 78      | 192-194   | 0.60 <sup>a</sup>                 |
| KS-81          | C <sub>16</sub> H <sub>16</sub> O <sub>6</sub> | 304.30           | 70      | 209-211   | 0.62                              |
| KS-82          | C <sub>21</sub> H <sub>18</sub> O <sub>6</sub> | 366.37           | 75      | 235-237   | 0.57                              |
| KS-92          | C <sub>19</sub> H <sub>14</sub> O <sub>6</sub> | 338.32           | 70      | 245-248   | 0.48                              |
| KS-94          | C <sub>20</sub> H <sub>16</sub> O <sub>6</sub> | 352.34           | 85      | 251-253   | 0.49                              |

<sup>\*</sup>Solvent System: Chloroform:Methanol (9:1)



#### General procedure for the synthesis of KS(80-82)

The compounds KS(80-82) was synthesized according to the general procedure given in scheme 1, using ethyl-4-chloroacetoacetate (1) (1 mmol) and substituted 7-hydroxycoumarin (2) (1.5 mmol) was stirred under reflux conditions in potassium carbonate (8 mmol) and acetone (50 ml) to afford compounds KS80-82. The crude products were treated with water, filtered, washed, dried and recrystallized with alcohol.

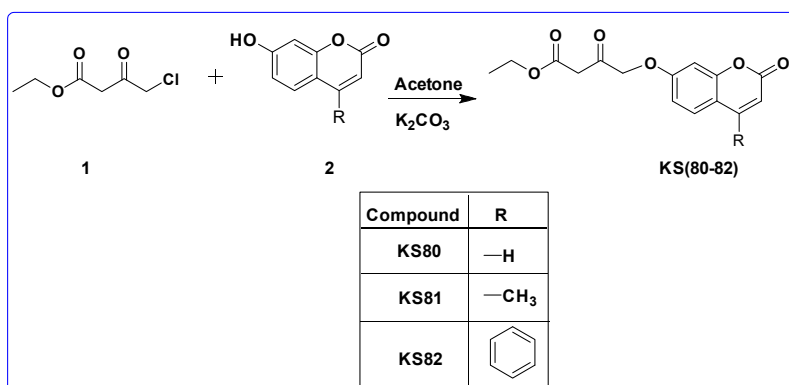

#### 2.4.2. General procedure for the synthesis of KS92 and KS94

The compound KS-92 and KS-94 were synthesized according to the general procedure given in scheme 2, ethyl-4-chloroacetoacetate (1) (0.1 mol) and phenol (3) (0.2 mol) was stirred in hydrochloric acid to get the intermediate 4. Subsequently, the intermediate 4 is refluxed with substituted 7-hydroxycoumarin (5) to afford the compound KS-92 and KS-94. The crude products were filtered, thoroughly washed with water to make it free from acid and dried. Then, purified on silica columns using  $CHCl_3$ : MeOH (9:1) as solvent.

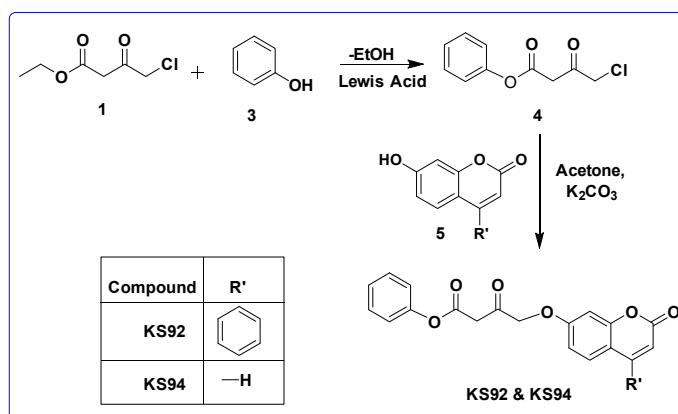

## Mechanism I

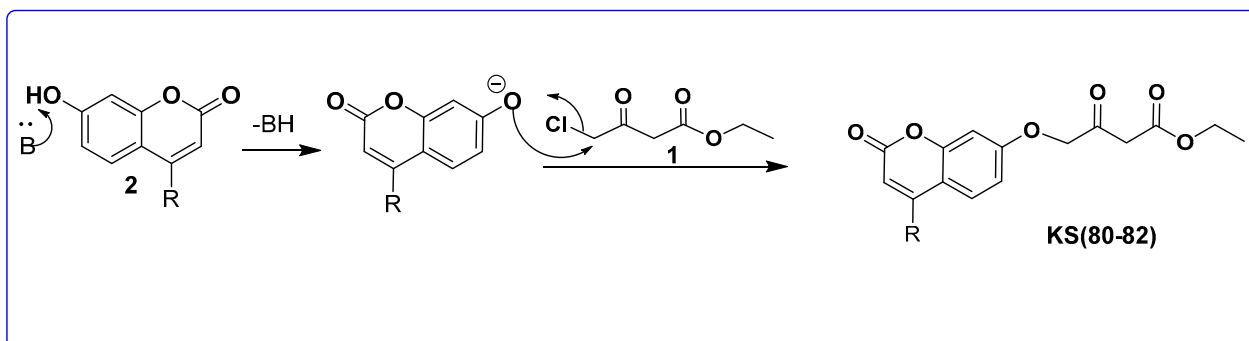

## Mechanism II

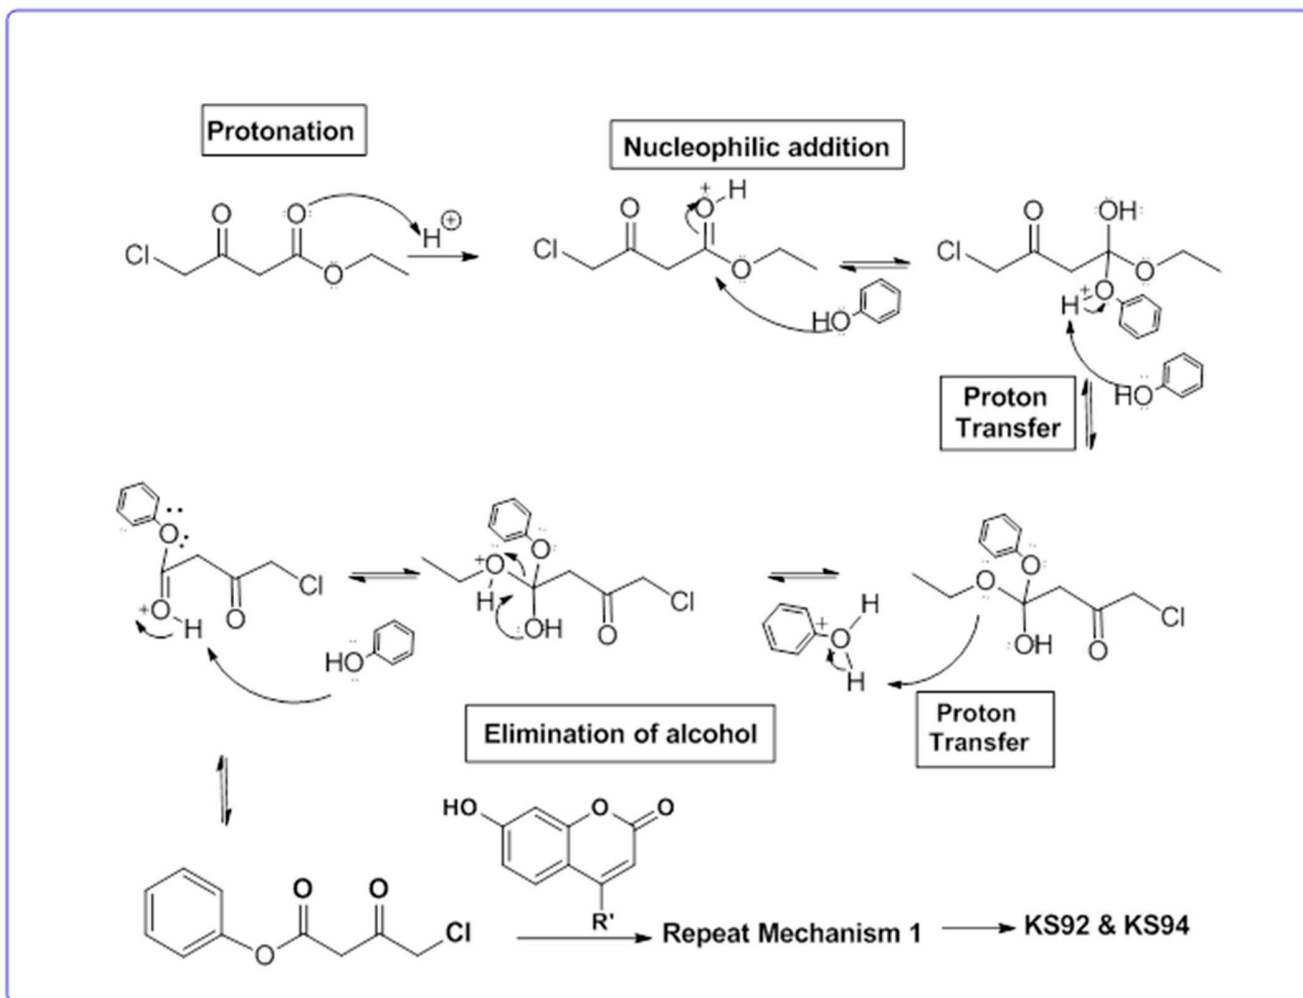

**<sup>1</sup>H-NMR Characterization of (KS-81) as representative compound**

**Ethyl 4-((4-methyl-2-oxo-2*H*-chromen-7-yl)oxy)-3-oxobutanoate (KS-81))**

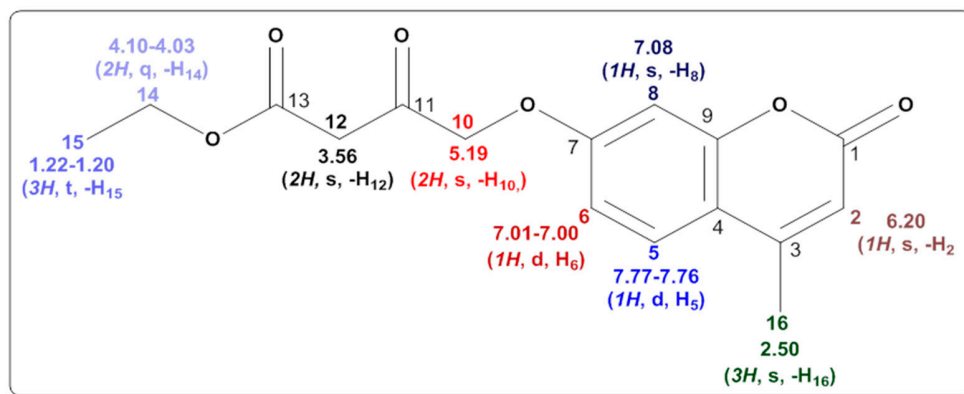

<sup>1</sup>H-NMR (500 MHz, DMSO-d<sub>6</sub>, δ ppm): 7.77-7.76 (1H, d, *J*=3.9 Hz, -H<sub>5</sub>), 7.08 (1H, s, -H<sub>8</sub>), 7.01-7.00 (1H, d, *J*=5.3 Hz, -H<sub>6</sub>), 6.20 (1H, s, -H<sub>2</sub>), 5.19 (2H, s, -H<sub>10</sub>), 4.10-4.03 (2H, q, -H<sub>14</sub>), 3.56 (2H, s, -H<sub>10</sub>), 2.50 (3H, s, -H<sub>16</sub>), 1.22-1.20 (3H, t, -H<sub>15</sub>)

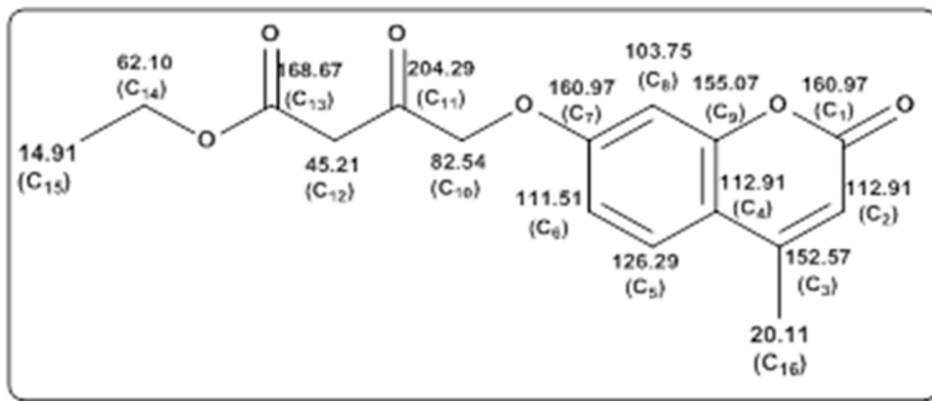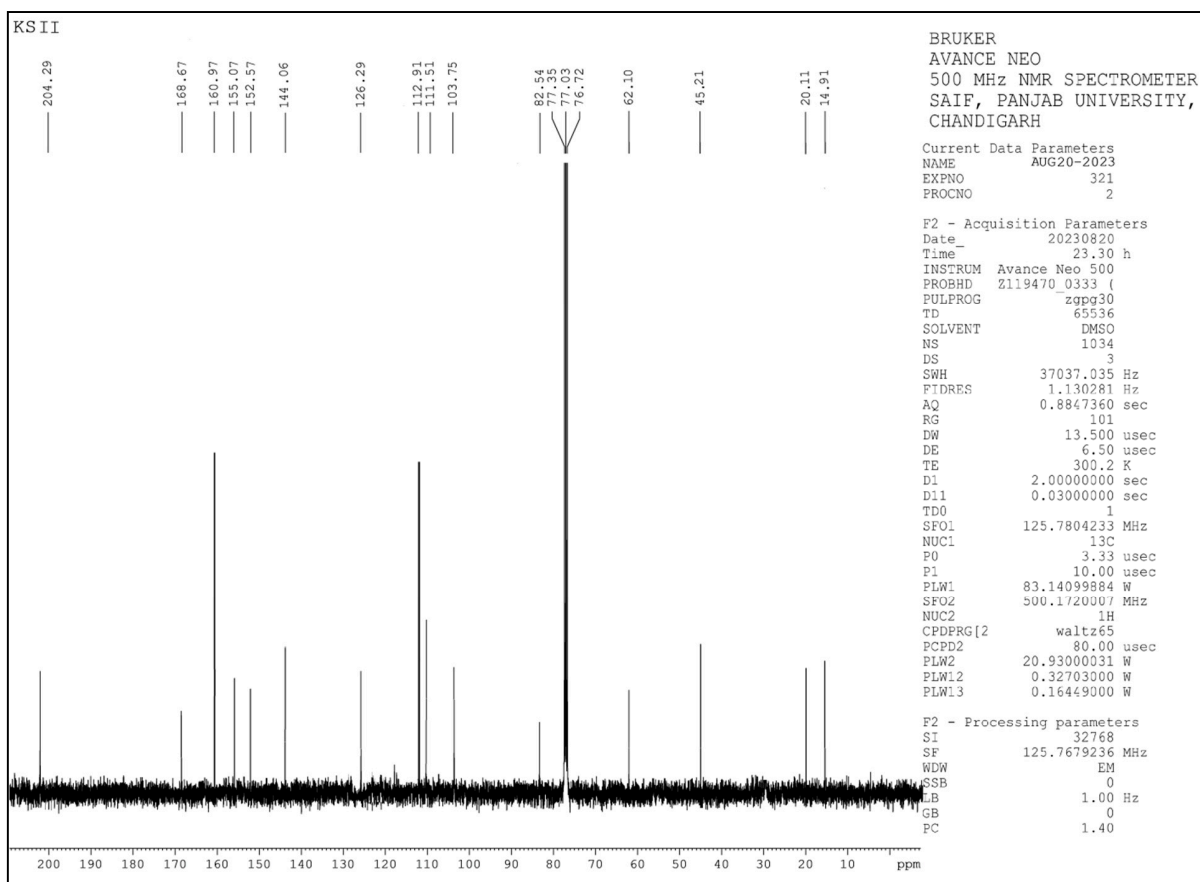

KS-80

KSI

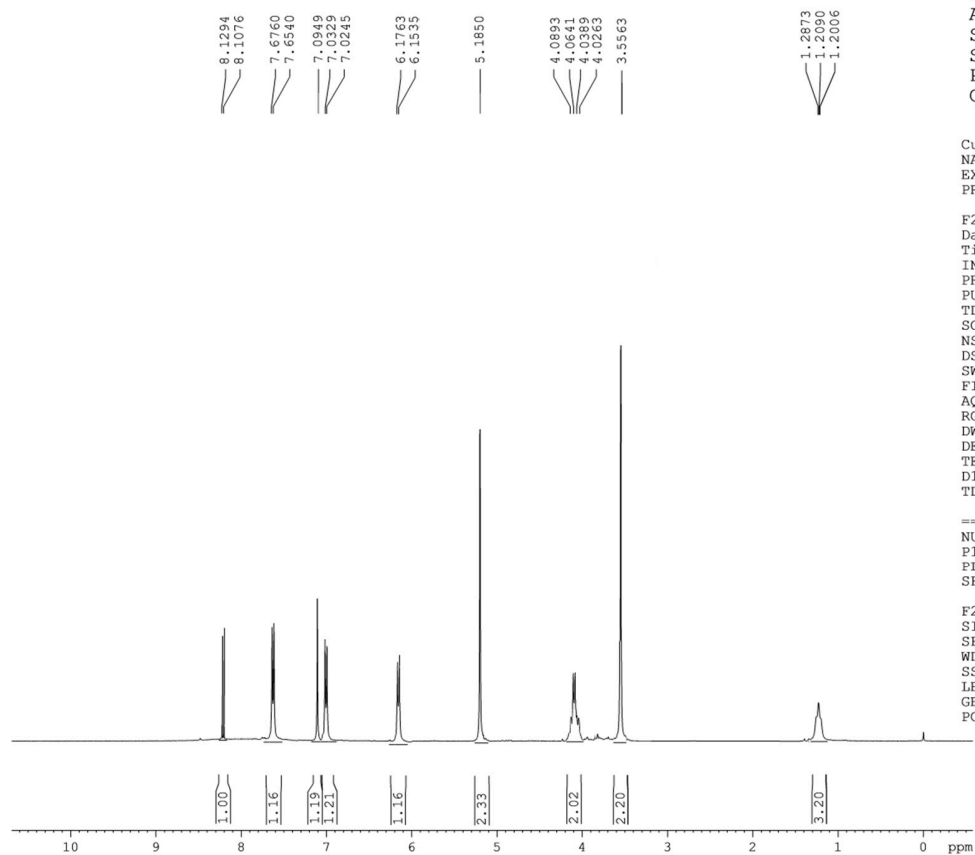

BRUKER  
AVANCE II 500 NMR  
Spectrometer  
SAIF  
Panjab University  
Chandigarh

Current Data Parameters  
NAME AUG20-2023  
EXPNO 500  
PROCNO 1

F2 - Acquisition Parameters  
Date\_ 20230820  
Time 0.43  
INSTRUM spect  
PROBHD 5 mm PABBO BB-  
PULPROG zg30  
TD 65533  
SOLVENT DMSO  
NS 8  
DS 3  
SWH 12039.230 Hz  
FIDRES 0.183399 Hz  
AQ 2.7263477 sec  
RG 436  
DW 41.600 usec  
DE 6.00 usec  
TE 294.7 K  
D1 1.00000000 sec  
TD0 1

===== CHANNEL f1 =====  
NUC1 1H  
P1 10.90 usec  
FL1 -3.00 dB  
SFO1 400.1324710 MHz

F2 - Processing parameters  
SI 32768  
SF 500.1300080 MHz  
WDW EM  
SSB 0  
LB 0.30 Hz  
GB 0  
PC 1.00

KSI

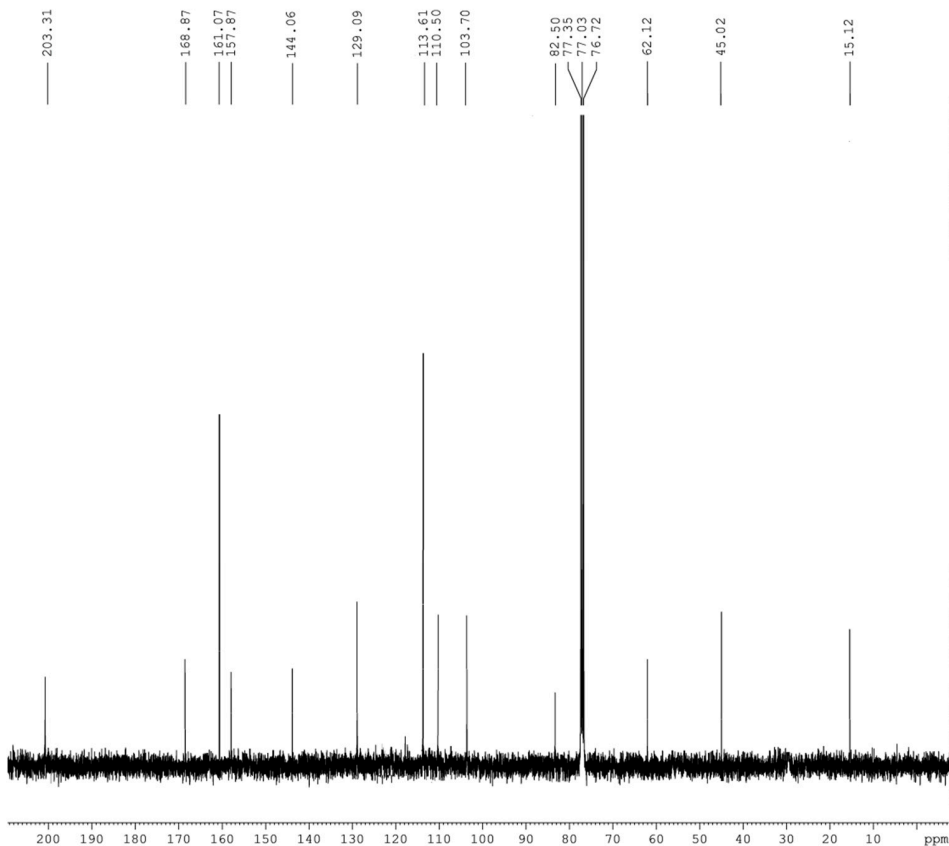

BRUKER  
AVANCE NEO  
500 MHz NMR SPECTROMETER  
SAIF, PANJAB UNIVERSITY,  
CHANDIGARH

Current Data Parameters  
NAME AUG20-2023  
EXPNO 301  
PROCNO 1

F2 - Acquisition Parameters  
Date\_ 20230820  
Time 22.04 h  
INSTRUM Avance Neo 500  
PROBHD Z119470\_0333 (zggg30)  
PULPROG zgpg30  
TD 65536  
SOLVENT DMSO  
NS 1034  
DS 3  
SWH 37037.035 Hz  
FIDRES 1.130281 Hz  
AQ 0.8847360 sec  
RG 101  
DW 13.500 usec  
DE 6.50 usec  
TE 300.2 K  
D1 2.00000000 sec  
D11 0.03000000 sec  
TD0 1  
SFO1 125.7804233 MHz  
NUC1 13C  
PO 3.33 usec  
P1 10.00 usec  
PLW1 83.14099884 W  
SFO2 500.1720007 MHz  
NUC2 1H  
CPDPRG[2] waltz65  
PCPD2 80.00 usec  
PLW2 20.93000031 W  
PLW12 0.32703000 W  
PLW13 0.16449000 W

F2 - Processing parameters  
SI 32768  
SF 125.7679236 MHz  
WDW EM  
SSB 0  
LB 1.00 Hz  
GB 0  
PC 1.40

CPD\_1\_(0.137) Cm (6.27)

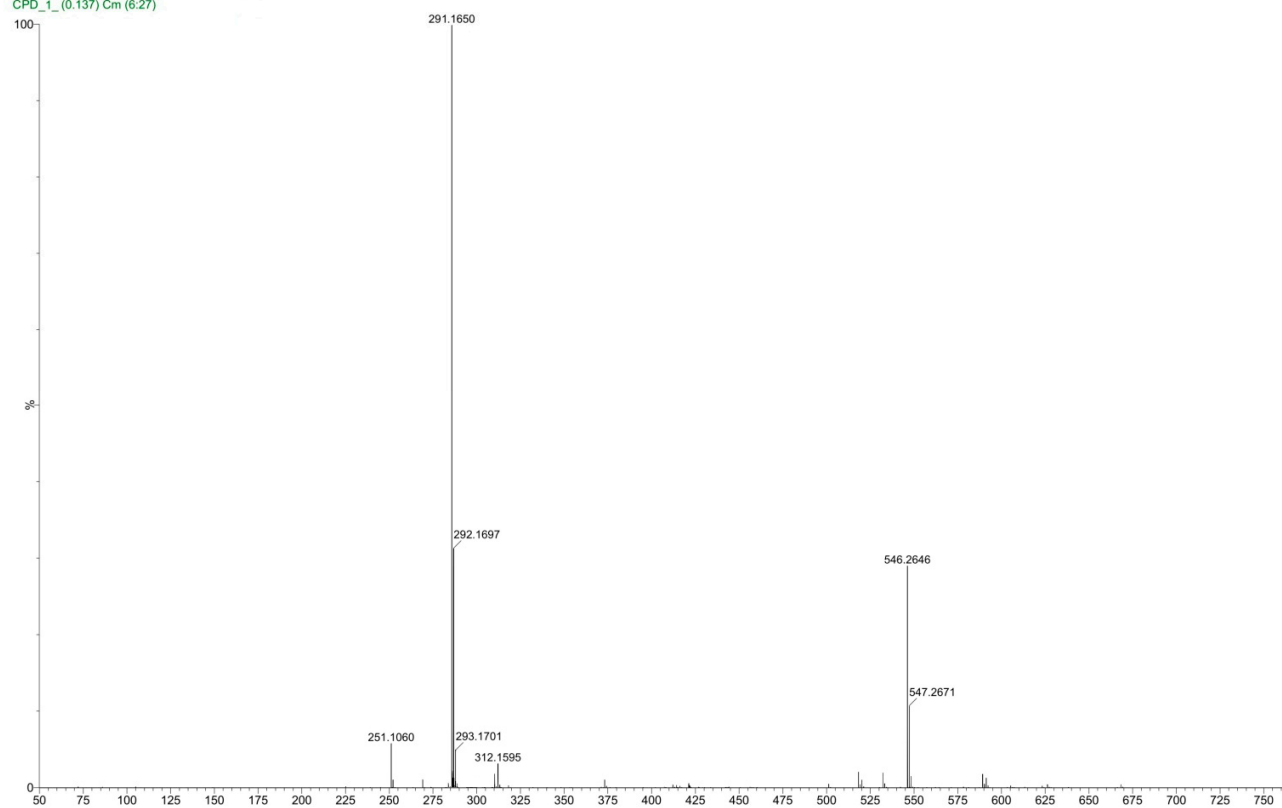

KS 81

KSII

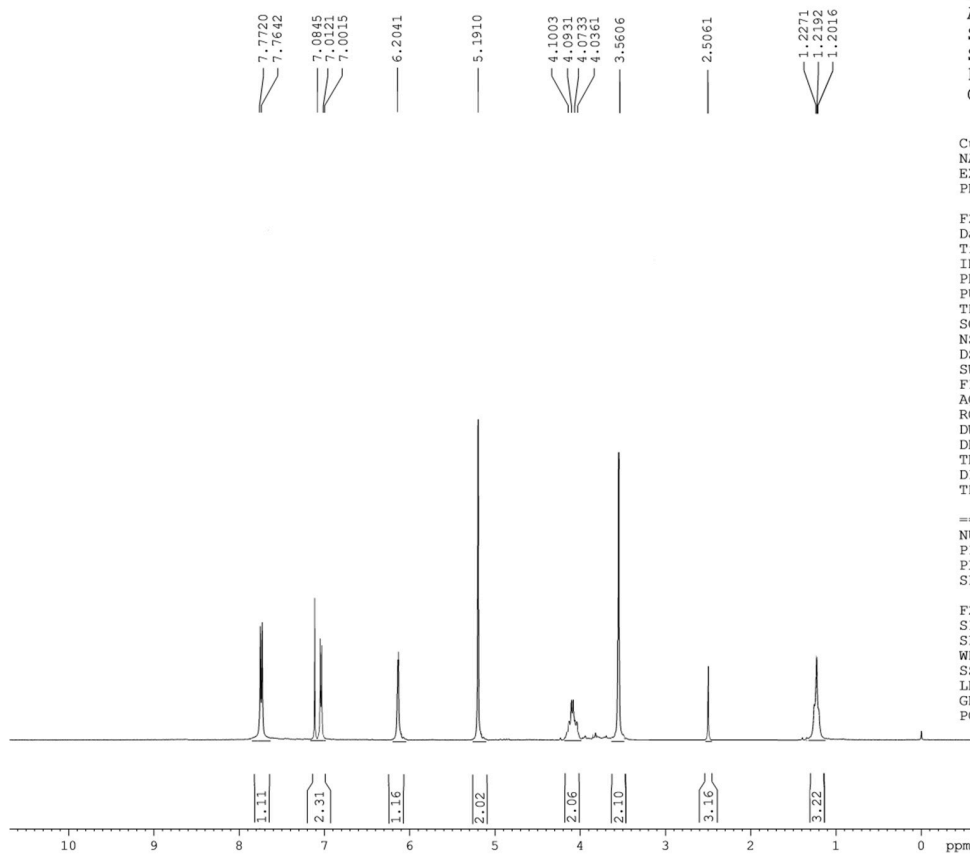

BRUKER  
AVANCE II 500 NMR  
Spectrometer  
SAIF  
Panjab University  
Chandigarh

Current Data Parameters  
NAME AUG20-2023  
EXPNO 500  
PROCNO 1

F2 - Acquisition Parameters  
Date\_ 20230820  
Time 01.43  
INSTRUM spect  
PROBHD 5 mm PABBO BB-  
PULPROG zg30  
TD 65433  
SOLVENT DMSO  
NS 8  
DS 3  
SWH 12039.230 Hz  
FIDRES 0.183399 Hz  
AQ 2.7243477 sec  
RG 436  
DW 41.600 usec  
DE 6.00 usec  
TE 294.7 K  
D1 1.00000000 sec  
TD0 1

===== CHANNEL f1 =====  
NUC1 1H  
P1 10.90 usec  
PL1 -3.00 dB  
SFO1 400.1324710 MHz

F2 - Processing parameters  
SI 32768  
SF 500.1300080 MHz  
WDW EM  
SSB 0  
LB 0.30 Hz  
GB 0  
PC 1.00



KSII

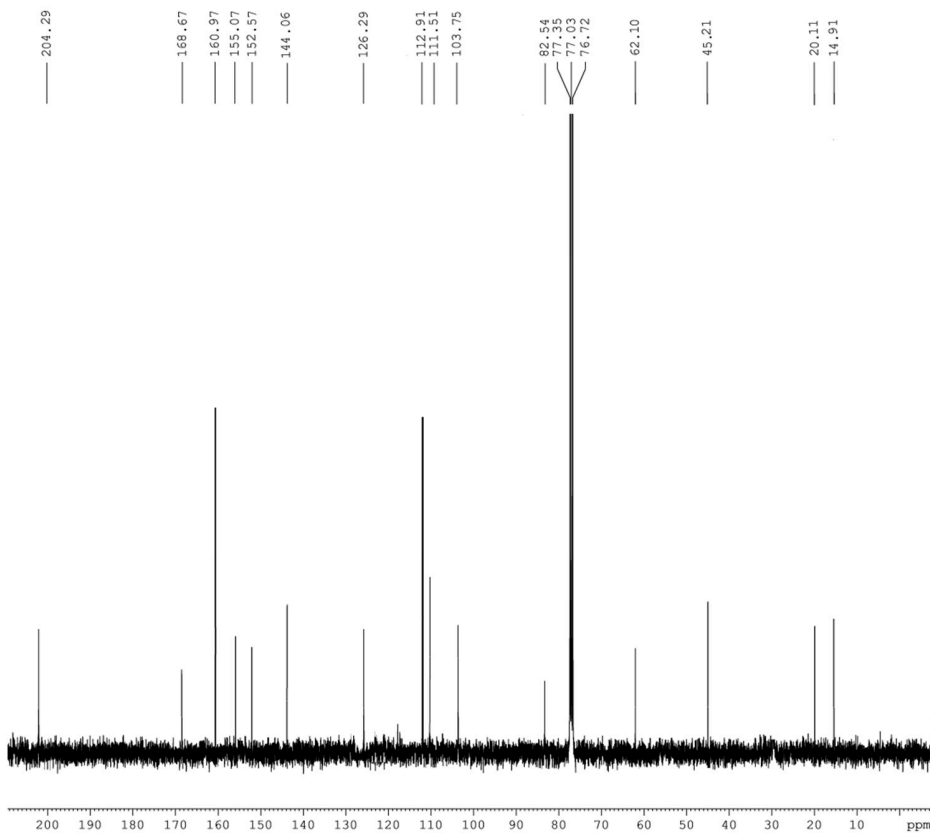

BRUKER  
 AVANCE NEO  
 500 MHz NMR SPECTROMETER  
 SAIF, PANJAB UNIVERSITY,  
 CHANDIGARH

Current Data Parameters  
 NAME AUG20-2023  
 EXPNO 321  
 PROCNO 2

F2 - Acquisition Parameters  
 Date\_ 20230820  
 Time\_ 23.30 h  
 INSTRUM Avance Neo 500  
 PROBHD Z119470 0333 (   
 PULPROG zgpg30  
 TD 65536  
 SOLVENT DMSO  
 NS 1034  
 DS 3  
 SWH 37037.035 Hz  
 FIDRES 1.130281 Hz  
 AQ 0.8847360 sec  
 RG 101  
 DW 13.500 usec  
 DE 6.50 usec  
 TE 300.2 K  
 D1 2.00000000 sec  
 D11 0.03000000 sec  
 TD0 1  
 SFO1 125.7804233 MHz  
 NUC1 13C  
 P0 3.33 usec  
 P1 10.00 usec  
 PLW1 83.14099884 W  
 SFO2 500.1720007 MHz  
 NUC2 1H  
 CPDPRG[2] waltz65  
 PCPD2 80.00 usec  
 PLW2 20.93000031 W  
 PLW12 0.32703000 W  
 PLW13 0.16449000 W

F2 - Processing parameters  
 SI 32768  
 SF 125.7679236 MHz  
 WDW EM  
 SSB 0  
 LB 1.00 Hz  
 GB 0  
 PC 1.40

WATERS, Q-TOF MICROMASS (LC-MS)  
MS2 (0.251) Cm (8.29)

SAIF/CIL,PANJAB UNIVERSITY,CHANDIGARH  
TOF MS ES+  
2.32e4

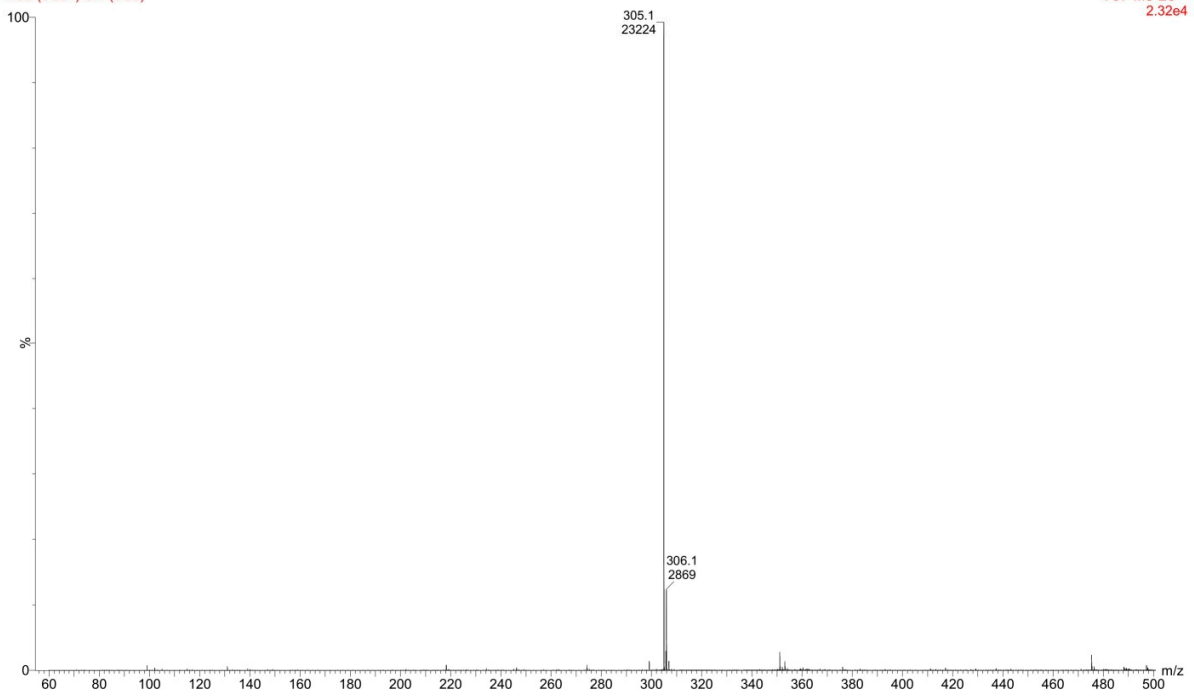

KS 82

KSIII

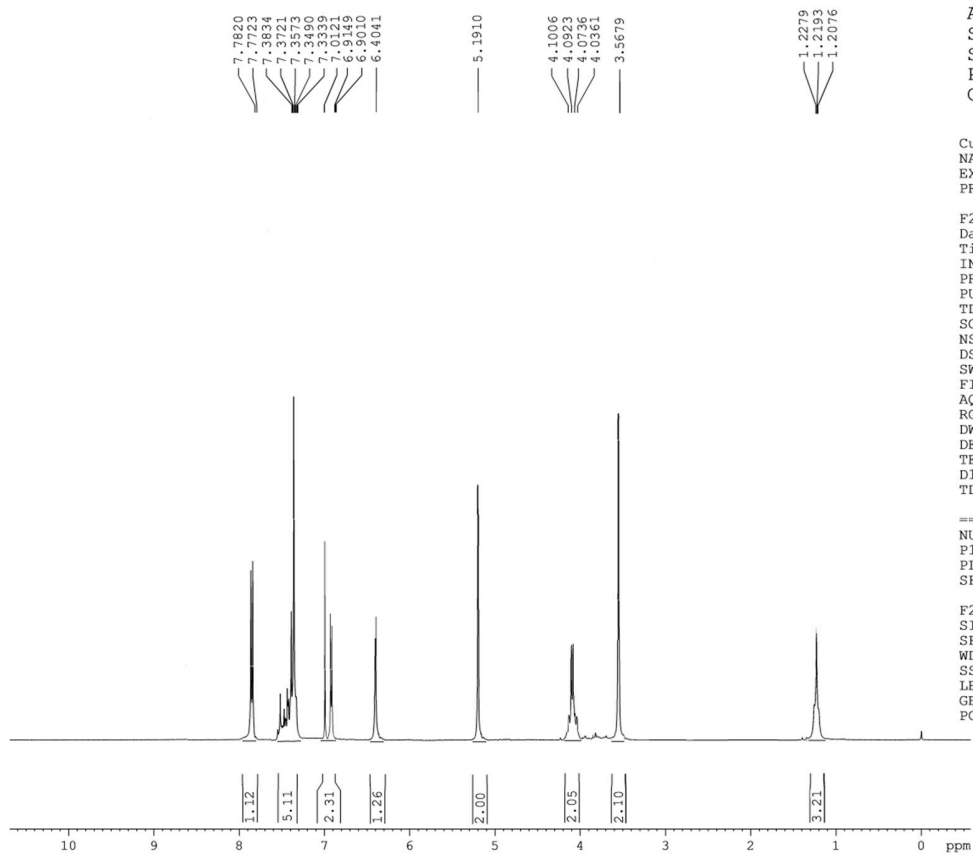

BRUKER  
AVANCE II 500 NMR  
Spectrometer  
SAIF  
Panjab University  
Chandigarh

Current Data Parameters  
NAME AUG28-2023  
EXPNO 500  
PROCNO 1

F2 - Acquisition Parameters  
Date\_ 20230828  
Time\_ 01.48  
INSTRUM spect  
PROBHD 5 mm PABBO BB-  
PULPROG zg30  
TD 65433  
SOLVENT DMSO  
NS 9  
DS 3  
SWH 12099.237 Hz  
FIDRES 0.183399 Hz  
AQ 2.9243479 sec  
RG 436  
DW 41.600 usec  
DE 6.00 usec  
TE 294.7 K  
D1 1.00000000 sec  
TD0 1

===== CHANNEL f1 =====  
NUC1 1H  
P1 10.90 usec  
PL1 -3.00 dB  
SFO1 400.1324710 MHz

F2 - Processing parameters  
SI 32767  
SF 500.1700080 MHz  
WDW EM  
SSB 0  
LB 0.30 Hz  
GB 0  
PC 1.00

KSIII

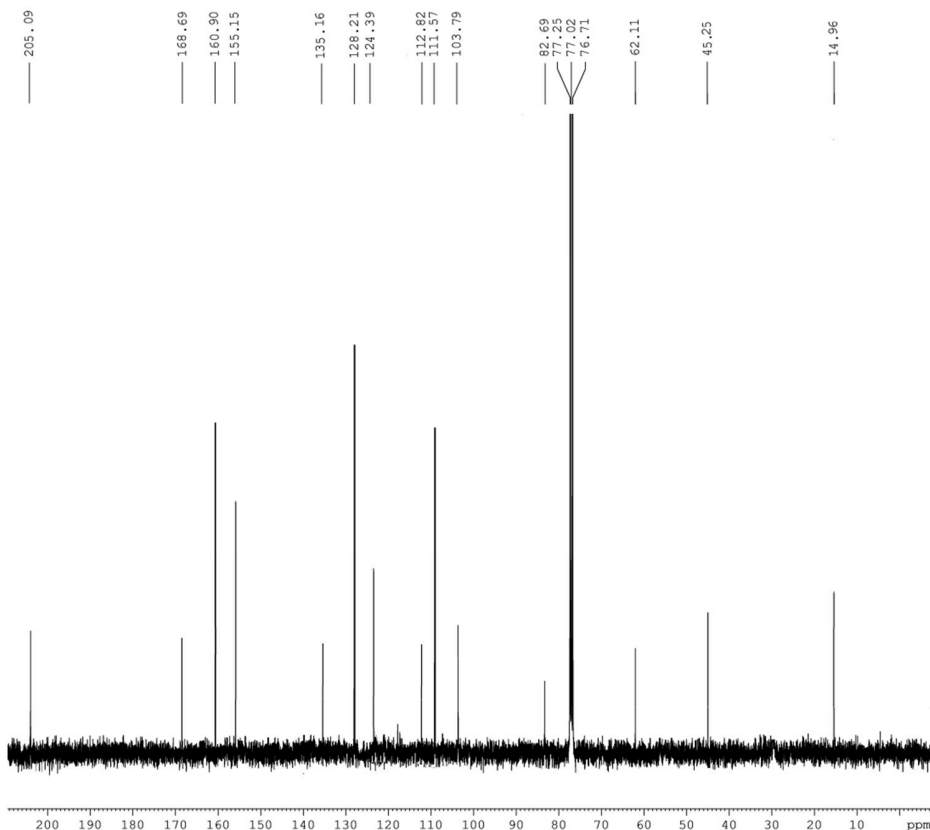

BRUKER  
 AVANCE NEO  
 500 MHz NMR SPECTROMETER  
 SAIF, PANJAB UNIVERSITY,  
 CHANDIGARH

Current Data Parameters  
 NAME AUG28-2023  
 EXPNO 323  
 FROCN 3

F2 - Acquisition Parameters  
 Date\_ 20230828  
 Time\_ 23.80 h  
 INSTRUM Avance Neo 500  
 PROBHD Z119470 0383  
 PULPROG zgpg30  
 TD 65533  
 SOLVENT DMSO  
 NS 1035  
 DS 3  
 SWH 37037.035 Hz  
 FIDRES 1.130281 Hz  
 AQ 0.8847360 sec  
 RG 101  
 DW 13.500 usec  
 DE 6.50 usec  
 TE 300.2 K  
 D1 2.00000000 sec  
 D11 0.03000000 sec  
 TD0 1  
 SFO1 125.7804233 MHz  
 NUC1 13C  
 P0 3.33 usec  
 P1 10.00 usec  
 PLW1 83.14099884 W  
 SFO2 500.1720007 MHz  
 NUC2 1H  
 CPDPRG[2] waltz65  
 PCPD2 80.00 usec  
 PLW2 20.93000031 W  
 PLW12 0.32703000 W  
 PLW13 0.16449000 W  
 F2 - Processing parameters  
 SI 32768  
 SF 125.7679236 MHz  
 WDW EM  
 SSB 0  
 LB 1.00 Hz  
 GB 0  
 PC 1.40

WATERS, Q-TOF MICROMASS (ESI-MS)

MS3 (0.200) Cm (7:14)

SAIF/CIL,PANJAB UNIVERSITY,CHANDIGARH

TOF MS ES+

2.83e4

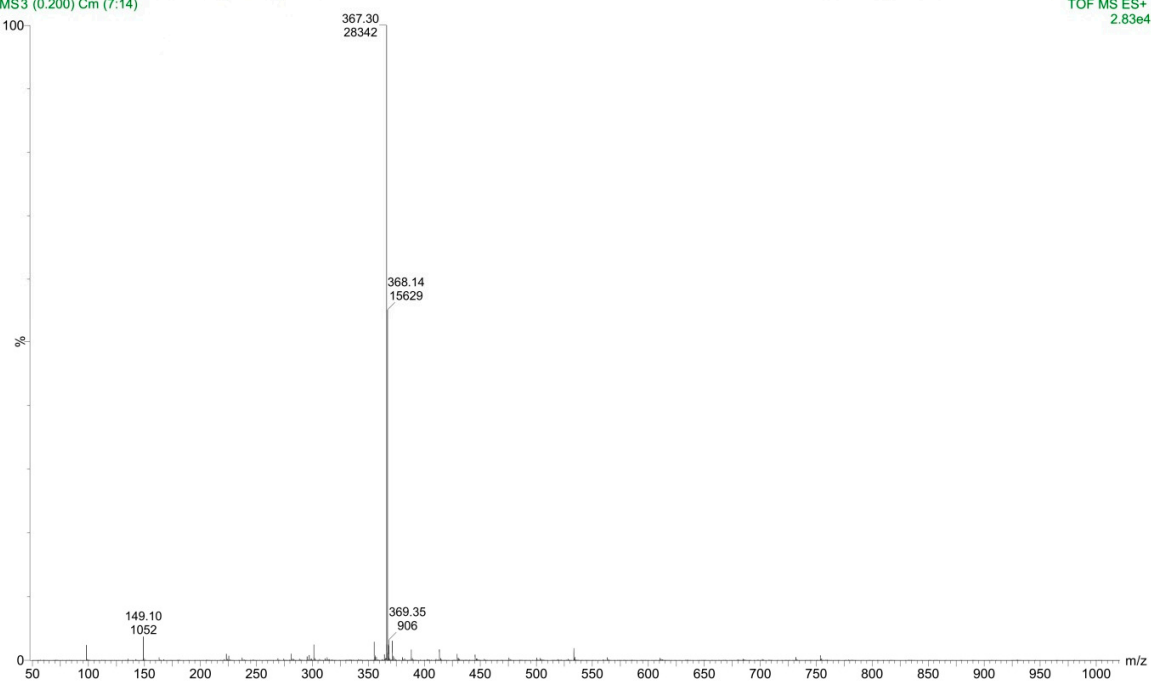

KS92

KS V

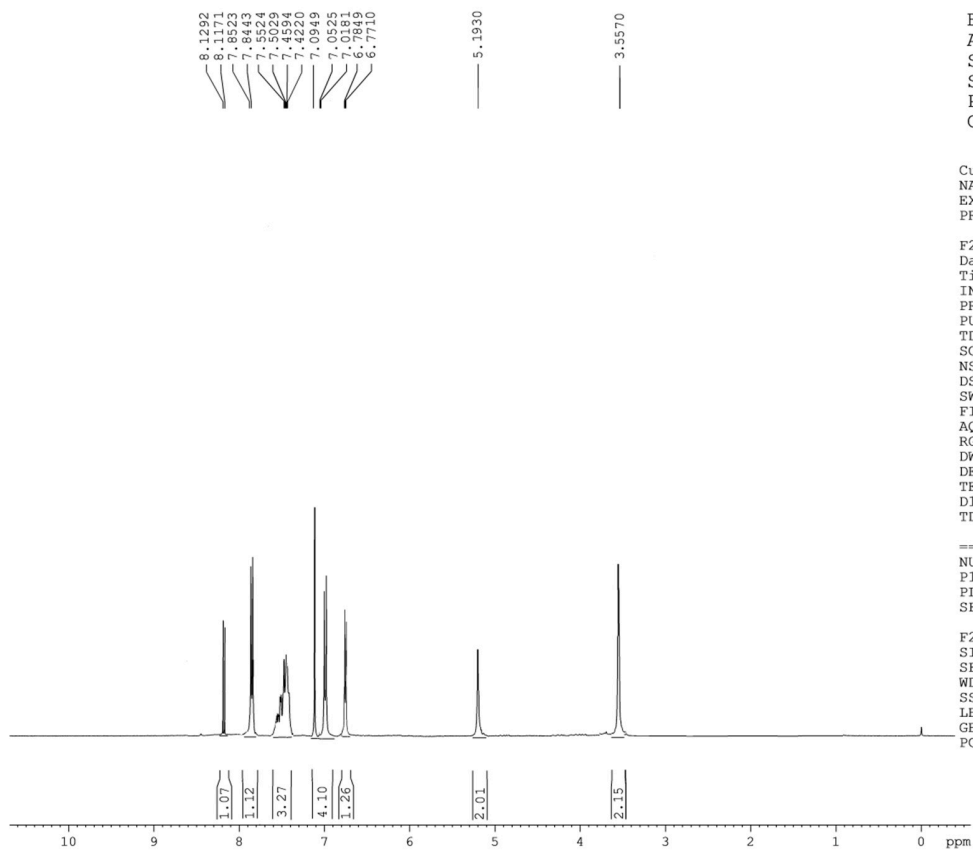

BRUKER  
AVANCE II 500 NMR  
Spectrometer  
SAIF  
Panjab University  
Chandigarh

Current Data Parameters  
NAME SEP08-2023  
EXPNO 508  
PROCNO 8

F2 - Acquisition Parameters  
Date\_ 20230908  
Time 08.48  
INSTRUM spect  
PROBHD 5 mm PABBO BB-  
PULPROG zg33  
TD 65439  
SOLVENT DMSO  
NS 7  
DS 3  
SWH 12097.237 Hz  
FIDRES 0.193397 Hz  
AQ 2.9243479 sec  
RG 437  
DW 42.700 usec  
DE 6.00 usec  
TE 274.7 K  
D1 1.00000000 sec  
TD0 1

===== CHANNEL f1 =====  
NUC1 1H  
P1 10.90 usec  
PL1 -3.00 dB  
SFO1 400.1327710 MHz

F2 - Processing parameters  
SI 32767  
SF 500.1700080 MHz  
WDW EM  
SSB 0  
LB 0.30 Hz  
GB 0  
PC 1.00

KSIV

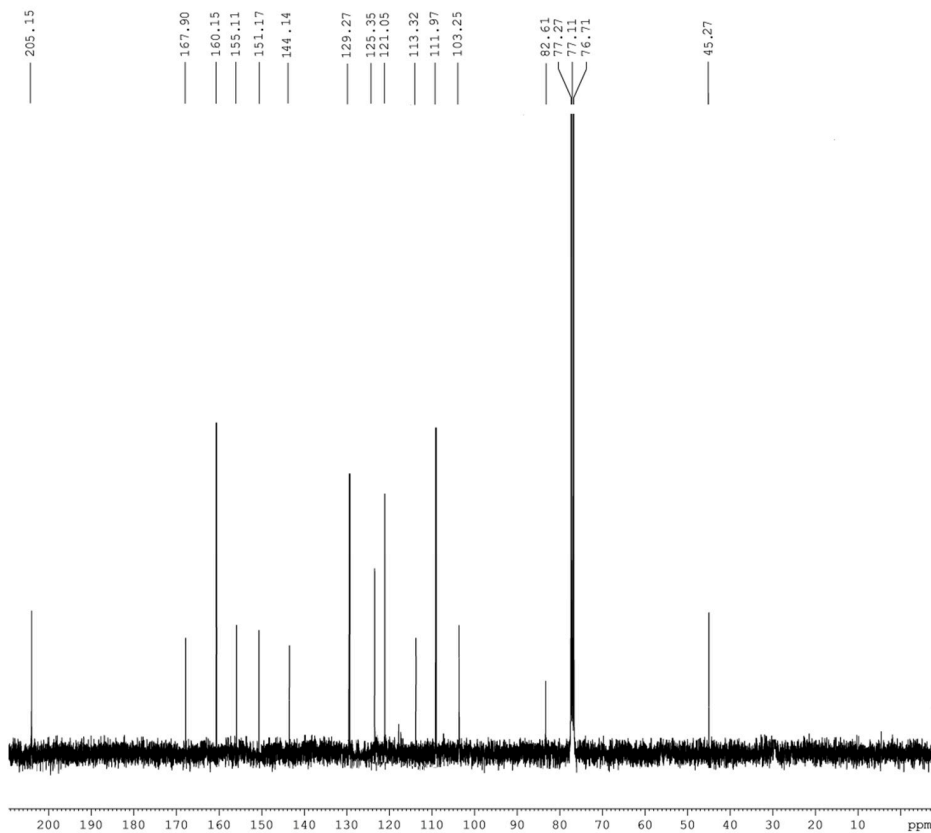

BRUKER  
 AVANCE NEO  
 500 MHz NMR SPECTROMETER  
 SAIF, PANJAB UNIVERSITY,  
 CHANDIGARH

Current Data Parameters  
 NAME SEP05-2023  
 EXPNO 323  
 FROCN 3

F2 - Acquisition Parameters  
 Date\_ 20230905  
 Time\_ 22.80 h  
 INSTRUM Avance Neo 500  
 PROBHD Z119470 0383  
 PULPROG zgpg30  
 TD 65532  
 SOLVENT DMSO  
 NS 1025  
 DS 3  
 SWH 37037.035 Hz  
 FIDRES 1.130281 Hz  
 AQ 0.8847360 sec  
 RG 101  
 DW 13.500 usec  
 DE 6.50 usec  
 TE 300.2 K  
 D1 2.00000000 sec  
 D11 0.03000000 sec  
 TD0 1  
 SFO1 125.7804233 MHz  
 NUC1 13C  
 P0 3.33 usec  
 P1 10.00 usec  
 PLW1 83.14099884 W  
 SFO2 500.1720007 MHz  
 NUC2 1H  
 CPDPRG[2] waltz65  
 PCPD2 80.00 usec  
 PLW2 20.93000031 W  
 PLW12 0.32703000 W  
 PLW13 0.16449000 W  
 F2 - Processing parameters  
 SI 32768  
 SF 125.7679236 MHz  
 WDW EM  
 SSB 0  
 LB 1.00 Hz  
 GB 0  
 PC 1.40

WATERS, Q-TOF MICROMASS (ESI-MS)

MS4 (0.200) Cm (7.12)

SAIF/CIL, PANJAB UNIVERSITY, CHANDIGARH

TOF MS ES+  
2.82e4

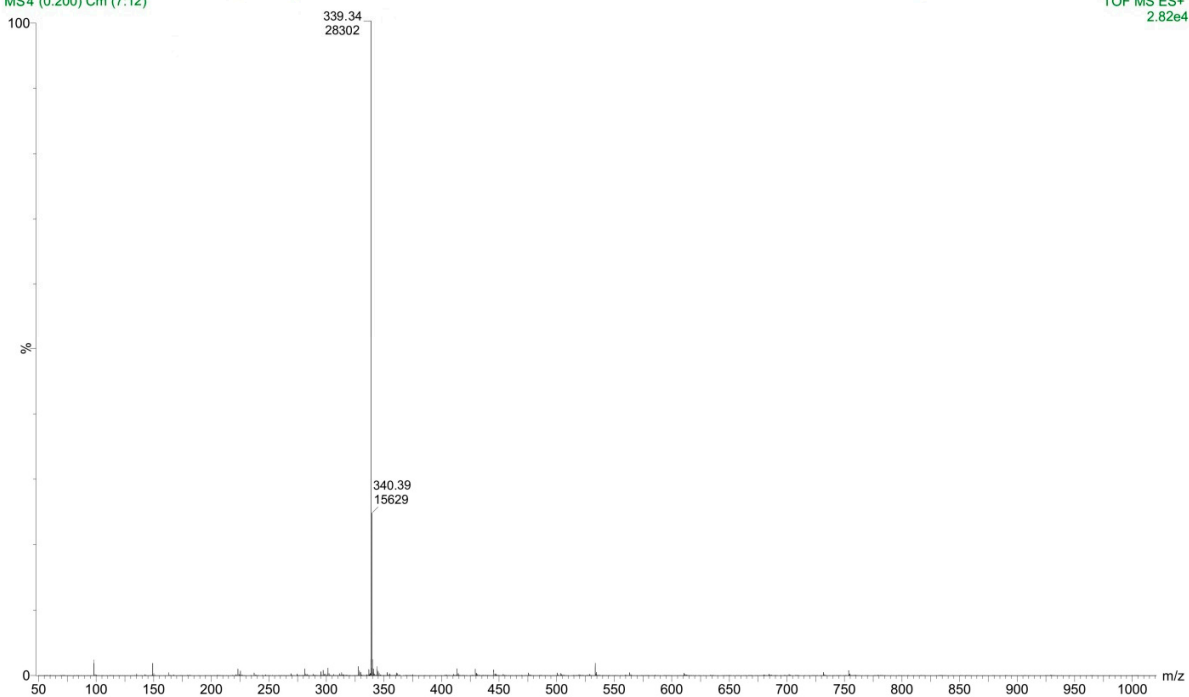



KS94

KS V

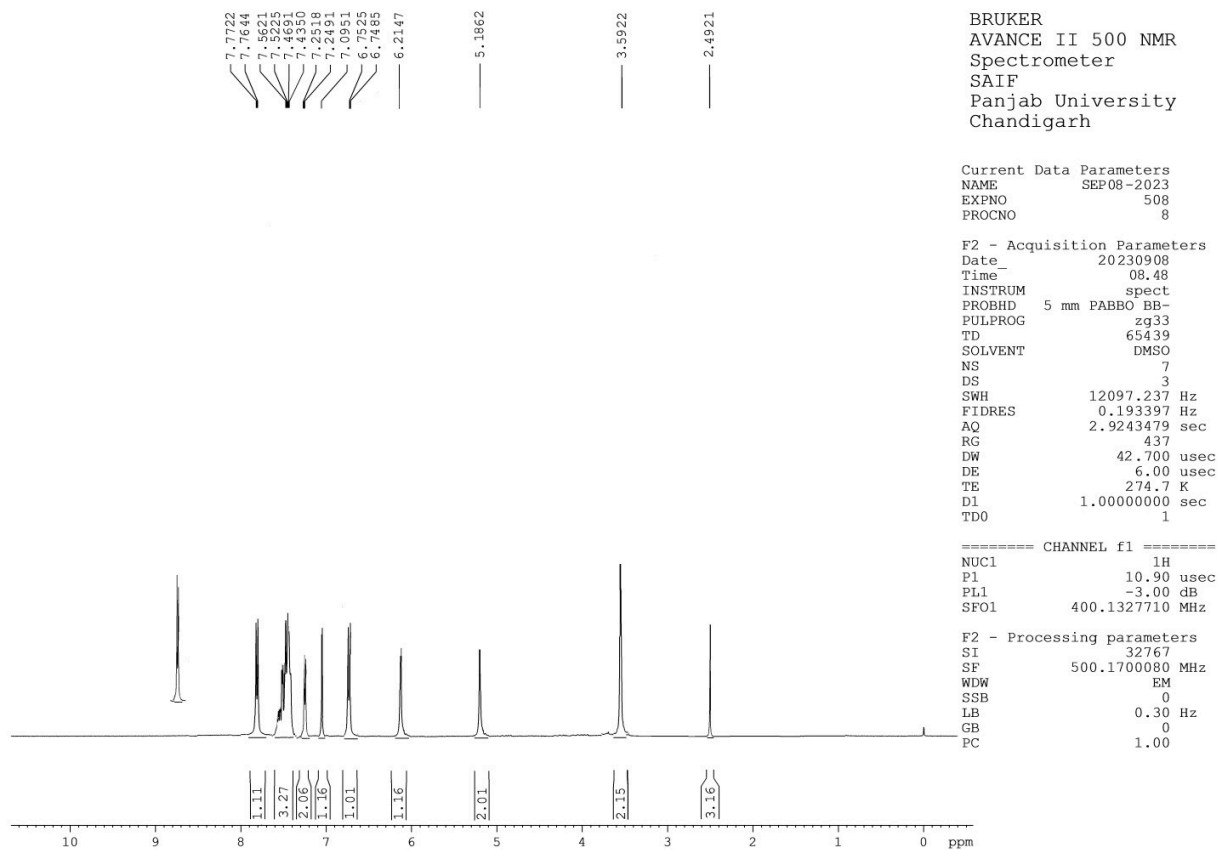

KSV

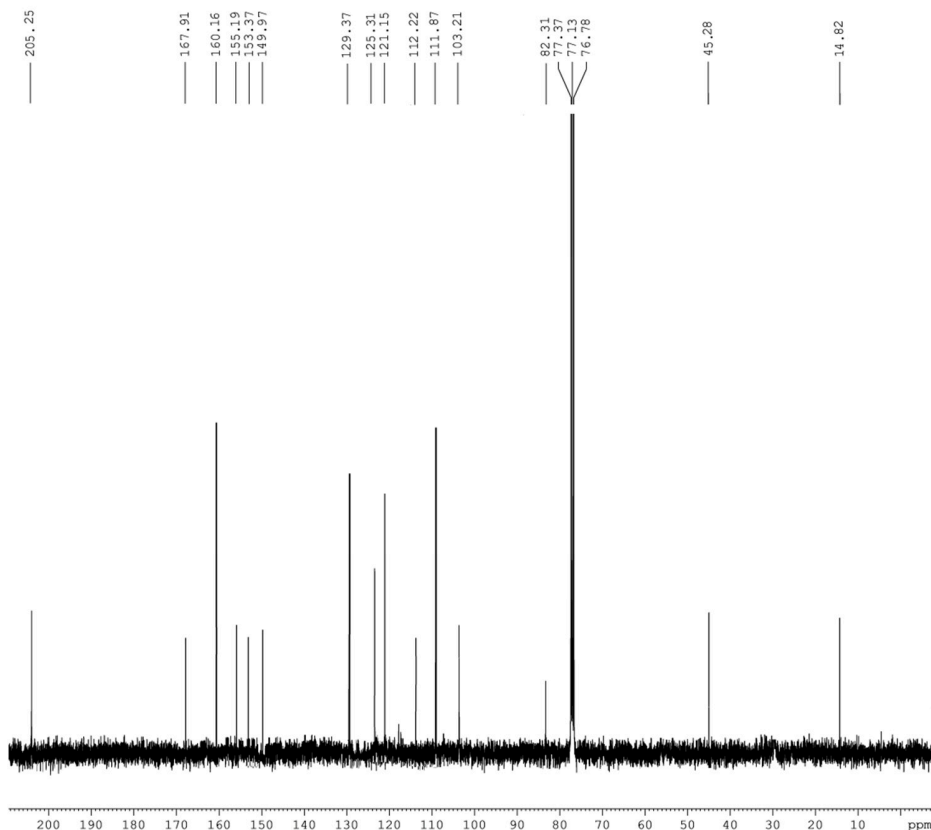

BRUKER  
 AVANCE NEO  
 500 MHz NMR SPECTROMETER  
 SAIF, PANJAB UNIVERSITY,  
 CHANDIGARH

Current Data Parameters  
 NAME SEP05-2023  
 EXPNO 325  
 FROCN 5

F2 - Acquisition Parameters  
 Date\_ 20230905  
 Time\_ 22.50 h  
 INSTRUM Avance Neo 500  
 PROBHD Z119470 0385  
 PULPROG zgpg30  
 TD 65532  
 SOLVENT DMSO  
 NS 1055  
 DS 3  
 SWH 37037.535 Hz  
 FIDRES 1.130281 Hz  
 AQ 0.8847360 sec  
 RG 101  
 DW 15.500 usec  
 DE 6.50 usec  
 TE 300.2 K  
 D1 2.00000000 sec  
 D11 0.03000000 sec  
 TD0 1  
 SFO1 125.7805233 MHz  
 NUC1 13C  
 P0 3.33 usec  
 P1 10.00 usec  
 PLW1 83.15099884 W  
 SFO2 500.1720007 MHz  
 NUC2 1H  
 CPDPRG[2] waltz65  
 PCPD2 80.00 usec  
 PLW2 20.93000031 W  
 PLW12 0.32703000 W  
 PLW13 0.16459000 W  
 F2 - Processing parameters  
 SI 32768  
 SF 125.7679236 MHz  
 WDW EM  
 SSB 0  
 LB 1.00 Hz  
 GB 0  
 PC 1.40

WATERS, Q-TOF MICROMASS (ESI-MS)

MS 7 10 (0.220) Cm (7:14)

SAIF/CIL, PANJAB UNIVERSITY, CHANDIGARH

TOF MS ES+  
2.83e4

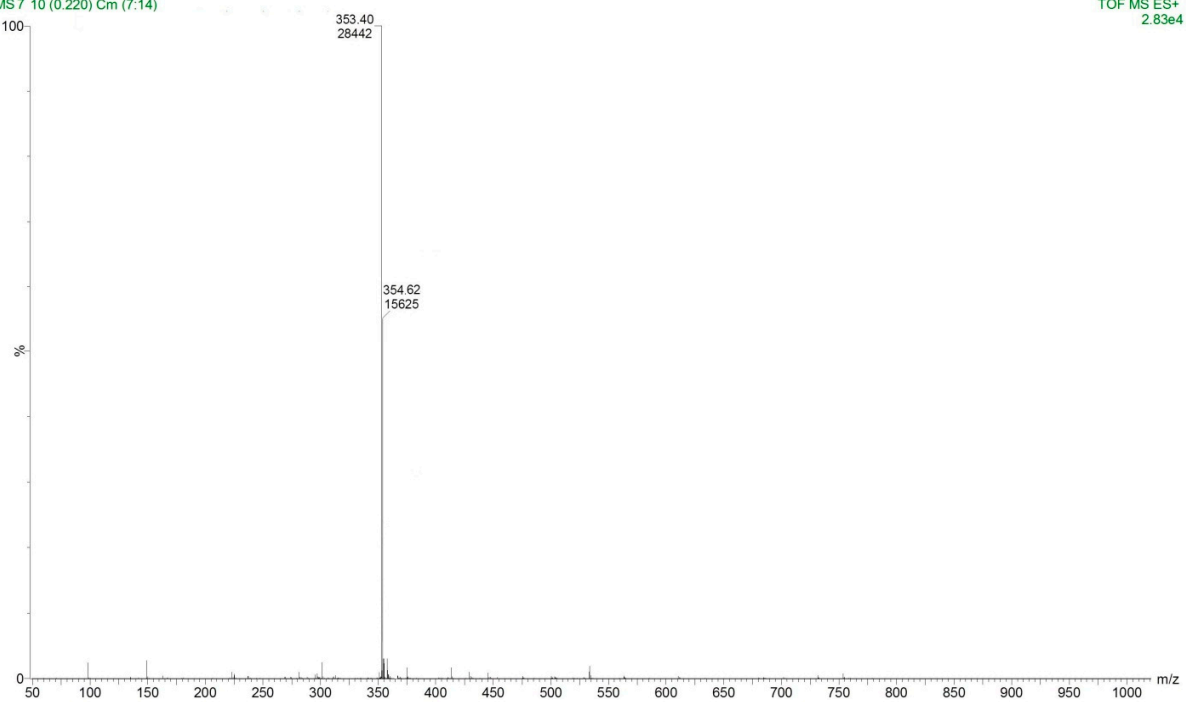

Supplement: s1 [file s1]
